# Supplementary material
Source: Springer Nature journal article supplement (https://www.springermedizin.de/resource/supplementary/12955_2012_1164_MOESM4_ESM.pdf/9558946)

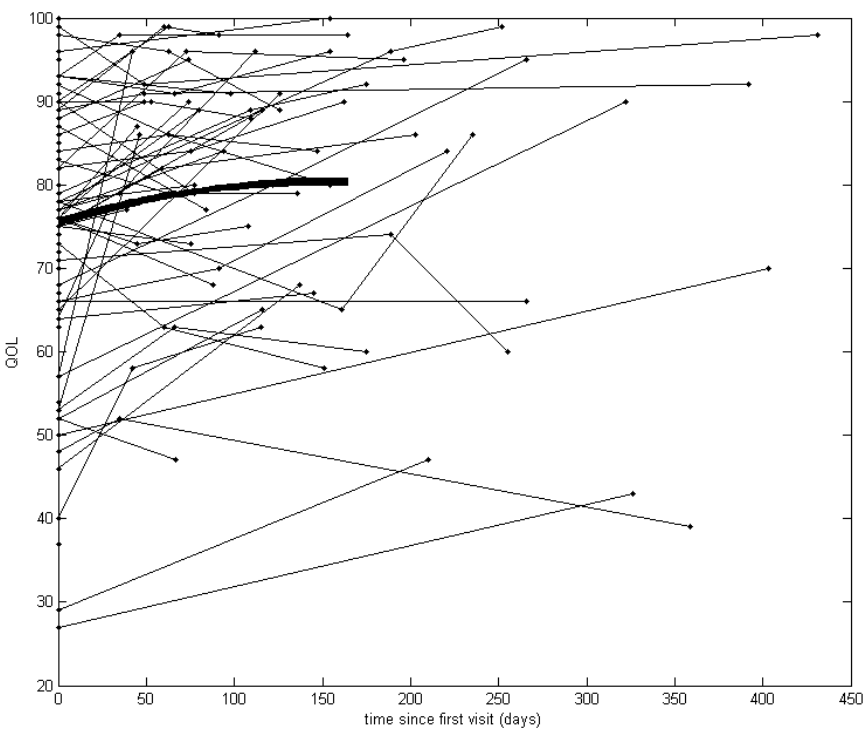

Supplement: MOESM4 [file 9558946]
